# Supplementary material
Source: PubMed Central journal article supplement (PMC2722284)
Supplement: 0900660106_0900660106SI.pdf [file 0900660106_0900660106SI.pdf]

# Supporting Information

Frentzen et al. 10.1073/pnas.0900660106

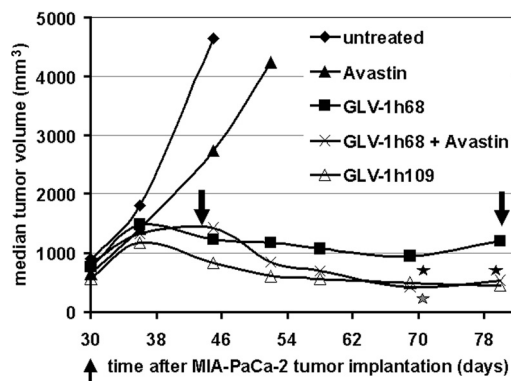

**Fig. S1.** Combination therapy of s.c. MIA PaCa-2 tumors with VACV GLV-1h68 and Avastin. Tumorous mice ( $n = 7$  per group) were treated with the virus alone ( $5 \times 10^6$  pfu/mouse), with Avastin alone (5 mg/kg i.p. twice weekly for 5 weeks), with the virus initially ( $5 \times 10^6$  pfu/mouse) followed by Avastin treatment (5 mg/kg twice weekly for 5 weeks) 13 days later, with GLV-1h109, or with no treatment. The up-pointing arrow indicates the time of virus injection. The down-pointing arrows indicate the beginning and end of Avastin treatment. Statistical analysis was performed using one-way ANOVA (\*\* $P < 0.01$ , \* $P < 0.05$ ). Stars indicate comparison of the GLV-1h68 group with the Avastin + GLV-1h68 group (gray) or with the GLV-1h109 group (black). Treatment with Avastin alone led to a delay in tumor growth compared with that in untreated mice. If given in combination with GLV-1h68, however, tumor regression was more pronounced than that seen in tumors treated only with GLV-1h68. The uniquely engineered VACV GLV-1h109 showed a similar effect as the combination treatment (GLV-1h68 and Avastin), which led to significantly smaller tumor volumes at later time points after infection.

A

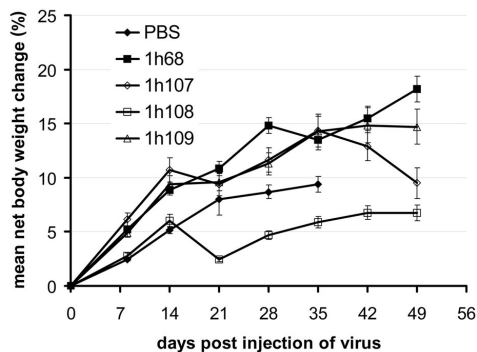

B

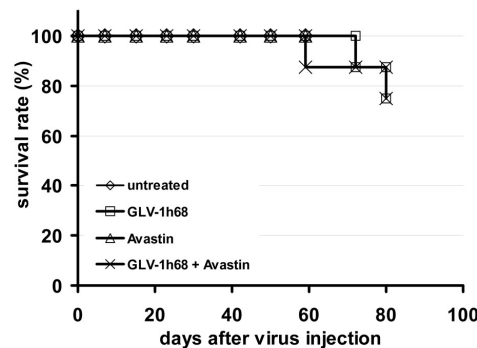

C

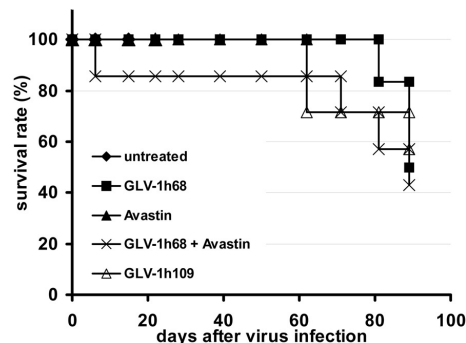

**Fig. S2.** (A) VACV strains expressing GLAF-1 showed safety and toxicity similar to GLV-1h68. To determine the safety and toxicity of the injected VACV strains in nude mice, the change in net body weight of A549 tumor-bearing animals was monitored over time. Injection of the GLV-1h107 VACV resulted in tolerance of the treatment for 35 days after virus injection. Body weight data were similar to those of mice treated with GLV-1h68. After 35 days, however, there was a significant drop in the net body weight of mice in the GLV-1h107 treatment group up to 2 weeks, which was not observed in the GLV-1h68 group. The reason for the late body weight loss is not known. Based on net body weight change data, GLV-1h109 showed comparable toxicity profiles to GLV-1h68 throughout the study. GLV-1h108 showed a significantly increased toxicity in comparison to GLV-1h68. The experimental groups contained 8 to 10 animals. (B and C) Survival rates of animals bearing different tumor xenografts after VACV treatment. Survival of animals after systemic application of VACVs GLV-1h68 and GLV-1h109 or GLV-1h68 and Avastin combination treatment is shown for PANC-1 (B) and MIA PaCa-2 (C). Untreated PANC-1 and MIA PaCa-2 tumor-bearing mice were killed because of extensive tumor burden at days 60 and 22 after virus injection, respectively. Avastin-treated PANC-1 and MIA PaCa-2 tumor-bearing mice were killed because of extensive tumor burden at days 60 and 15 after virus injection, respectively. The VACV-treated groups showed a survival rate of 75% in the PANC-1 experiment. However, the combination treatment was less well tolerated, because mice started to die earlier in the course of the experiment. Also in the MIA PaCa-2 animal model, an initial drop in survival was seen in the combination group. GLV-1h109-treated mice seemed to tolerate the VACV treatment slightly less well compared with GLV-1h68-treated mice earlier in the course of the experiment, even though the survival rate at the end of the experiment was lower in the GLV-1h68-treated group than in the GLV-1h109-treated group.





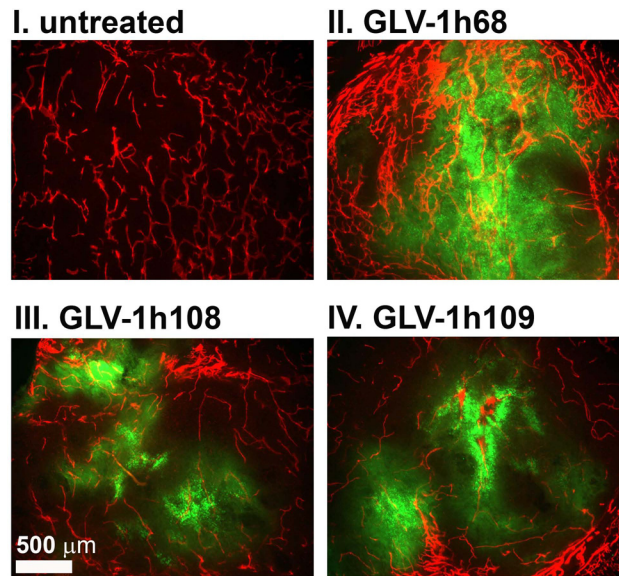

**Fig. S4.** Effect of VACV treatment on tumor vasculature in A549 tumor xenografts. A549 cells ( $5 \times 10^6$ ) were implanted s.c. into the lateral thigh of 4–5-week-old mice. Twelve days later, mice were injected i.v. with the different VACV strains at  $5 \times 10^6$  pfu/mouse. Tumors were excised 7 days p.i. and snap-frozen in liquid  $\text{N}_2$ . Paraformaldehyde-fixed tumors were cut in  $100\text{-}\mu\text{m}$  sections using a vibratome. Specimens were then labeled with anti-CD31 antibody (BD Pharmingen), followed by incubation with Cy3-conjugated donkey anti-rat antibody (Jackson ImmunoResearch). Examination of the tumor sections was conducted with an MZ16 FA fluorescence stereomicroscope (Leica) equipped with a digital CCD camera (Leica). GFP expression of virus-infected cells and CD31 expression (red) in tumor sections were monitored. Digital images were processed using Adobe Photoshop 7.0 software. All images are representative examples. (Scale bar:  $500\ \mu\text{m}$ .) Representative examples of CD31 and GFP expression in A549 tumors treated with the VACV strains GLV-1h68, GLV-1h108, and GLV-1h109 are shown. Untreated control tumors and tumors treated with GLV-1h68 (I and II) showed highly vascularized tumor tissues. In contrast, tumors obtained from mice infected with GLV-1h108 and GLV-1h109 revealed drastically less CD31-positive BVD in virus-infected areas (III and IV).

**Table S1. Biodistribution of GLV-1h107, GLV-1h108, and GLV-1h109 VACV in A549 tumor-bearing nude mice at 1 week p.i.**

|               | GLV-1h68          |                   |                   | GLV-1h107         |                   |                   | GLV-1h108          |                   |                   | GLV-1h109          |                   |                   |                   |                   |                   |                   |
|---------------|-------------------|-------------------|-------------------|-------------------|-------------------|-------------------|--------------------|-------------------|-------------------|--------------------|-------------------|-------------------|-------------------|-------------------|-------------------|-------------------|
| Animal no.    | 1                 | 2                 | 3                 | 4                 | 5                 | 6                 | 7                  | 8                 | 9                 | 10                 | 11                | 12                | 13                | 14                | 15                | 16                |
| Bladder       | 0                 | 0                 | 0                 | 0                 | 0                 | 48.1              | 0                  | 0                 | 0                 | 0                  | 0                 | 0                 | 0                 | 0                 | 0                 | 0                 |
| Testes        | 0                 | 0                 | 0                 | 0                 | 0                 | 0                 | 0                  | 0                 | 0                 | 0                  | 0                 | 0                 | 0                 | 0                 | 0                 | 0                 |
| Spleen        | 0                 | 78                | 0                 | 0                 | 0                 | 0                 | 40.3               | 0                 | 0                 | 0                  | 0                 | 0                 | 0                 | 40                | 0                 | 0                 |
| Kidneys       | 0                 | 0                 | 0                 | 0                 | 0                 | 0                 | 0                  | 0                 | 0                 | 0                  | 0                 | 0                 | 0                 | 0                 | 0                 | 0                 |
| Liver         | 0                 | 0                 | 0                 | 0                 | 0                 | 0                 | 0                  | 0                 | 0                 | 0                  | 0                 | 0                 | 0                 | 0                 | 0                 | 0                 |
| Lungs         | 0                 | 0                 | 0                 | 0                 | 0                 | 0                 | 31.6               | 0                 | 0                 | 0                  | 28.7              | 0                 | 139               | 0                 | 0                 | 0                 |
| Heart         | 0                 | 0                 | 0                 | 0                 | 0                 | 0                 | 0                  | 0                 | 33.3              | 0                  | 0                 | 0                 | 0                 | 0                 | 0                 | 0                 |
| Brain         | 0                 | 0                 | 0                 | 0                 | 0                 | 0                 | 0                  | 0                 | 0                 | 0                  | 0                 | 0                 | 0                 | 0                 | 0                 | 0                 |
| Tumor         | $2.1 \times 10^6$ | $1.9 \times 10^6$ | $3.5 \times 10^6$ | $1.4 \times 10^6$ | $4.2 \times 10^5$ | $4.0 \times 10^6$ | $2.4 \times 10^6$  | $2.0 \times 10^6$ | $3.2 \times 10^4$ | $2.9 \times 10^7$  | $3.0 \times 10^6$ | $7.5 \times 10^5$ | $1.2 \times 10^6$ | $2.9 \times 10^6$ | $2.7 \times 10^6$ | $2.6 \times 10^5$ |
| Tumor, median | $2 \times 10^6$   |                   |                   | $2.2 \times 10^6$ |                   |                   | $1.88 \times 10^6$ |                   |                   | $1.95 \times 10^6$ |                   |                   |                   |                   |                   |                   |

Viral titer in tissue samples, pfu per organ or grams of tumor. To determine the clearance of the 3 new VACV strains, A549 tumor-bearing mice (250 mm<sup>3</sup>) were injected i.v. with GLV-1h107, GLV-1h108, and GLV-1h109 and with GLV-1h68 as a control ( $5 \times 10^6$  pfu/mouse). Titers were recovered from different organs and tumors at 1, 2.5, 4, and 6 weeks p.i. Tissues were dissected and disrupted in homogenization tubes (Roche MagNA Lyser Green Beads; Roche). After 3 freeze/thaw cycles, tissues were sonicated 3 times for 60 seconds. Viral titers were determined after culture on CV-1 cells. Serial dilutions were applied in case of tumor tissue to determine viral titers. Virus was rapidly cleared from all organs except tumors less than 1 week p.i. \*\*\* signifies large amount of plaques in the brain of 1 mouse. Overall, the viral titers in tumors were found to be  $10^4$  to  $10^7$  logs higher than titers found in all other organs combined. The median viral titers in tumors increased gradually over the course of 4 weeks with all viruses tested, with the exception of GLV-1h109-infected tumors, in which the median viral titer reached the maximum 2.5 weeks p.i. After 6 weeks, median viral titers in all tumors decreased in comparison to the 4-week time points (C and D). Median control virus GLV-1h68 titers increased over the first 4-week period and were found to be generally higher than the titers in tumors colonized by the 3 novel VACV strains. These results also showed that all 3 new VACV strains, GLV-1h107, GLV-1h108, and GLV-1h109, exhibited similar tumor specificity.

**Table S1 (continued). Biodistribution of GLV-1h107, GLV-1h108, and GLV-1h109 VACV in A549 tumor-bearing nude mice at 2.5 weeks p.i.**

|               | GLV-1h68 |                   |                   |                   | GLV-1h107         |                    |                   |                   | GLV-1h108         |                    |                   |                   | GLV-1h109         |                   |                 |                   |  |
|---------------|----------|-------------------|-------------------|-------------------|-------------------|--------------------|-------------------|-------------------|-------------------|--------------------|-------------------|-------------------|-------------------|-------------------|-----------------|-------------------|--|
| Animal no.    | 1        | 2                 | 3                 | 4                 | 5                 | 6                  | 7                 | 8                 | 9                 | 10                 | 11                | 12                | 13                | 14                | 15              | 16                |  |
| Bladder       | 0        | 0                 | 0                 | 0                 | 0                 | 0                  | 0                 | 0                 | 0                 | 0                  | 0                 | 0                 | 0                 | 0                 | 0               | 0                 |  |
| Testes        | 0        | 0                 | 0                 | 0                 | 0                 | 0                  | 0                 | 0                 | 0                 | 0                  | 0                 | 0                 | 0                 | 0                 | 0               | 0                 |  |
| Spleen        | 0        | 0                 | 0                 | 0                 | 0                 | 0                  | 0                 | 0                 | 0                 | 0                  | 0                 | 0                 | 0                 | 0                 | 0               | 0                 |  |
| Kidneys       | 0        | 0                 | 25.5              | 0                 | 0                 | 0                  | 0                 | 0                 | 0                 | 0                  | 0                 | 0                 | 0                 | 0                 | 0               | 0                 |  |
| Liver         | 0        | 0                 | 0                 | 0                 | 0                 | 0                  | 0                 | 0                 | 0                 | 0                  | 0                 | 0                 | 0                 | 0                 | 0               | 0                 |  |
| Lungs         | 0        | 29.1              | 32.9              | 0                 | 0                 | 0                  | 0                 | 0                 | 0                 | 0                  | 0                 | 0                 | 0                 | 0                 | 0               | 0                 |  |
| Heart         | 0        | 0                 | 0                 | 0                 | 0                 | 0                  | 0                 | 0                 | 0                 | 0                  | 0                 | 0                 | 0                 | 0                 | 0               | 0                 |  |
| Brain         | 0        | 0                 | 0                 | 0                 | 0                 | 0                  | 0                 | 0                 | 0                 | 0                  | 0                 | 0                 | 0                 | 0                 | 0               | 0                 |  |
| Tumor         | 0        | $1.6 \times 10^7$ | $6.6 \times 10^6$ | $1.9 \times 10^7$ | $3.9 \times 10^6$ | $9.6 \times 10^6$  | $1.0 \times 10^7$ | $1.6 \times 10^6$ | $1.0 \times 10^7$ | $4.9 \times 10^6$  | $2.1 \times 10^7$ | $2.2 \times 10^5$ | $1.1 \times 10^6$ | $3.7 \times 10^6$ | $6 \times 10^6$ | $2.5 \times 10^6$ |  |
| Tumor, median |          | $1.6 \times 10^7$ |                   |                   |                   | $6.75 \times 10^6$ |                   |                   |                   | $7.45 \times 10^6$ |                   |                   |                   | $3.1 \times 10^6$ |                 |                   |  |

**Table S1 (continued). Biodistribution of GLV-1h107, GLV-1h108, and GLV-1h109 VACV in A549 tumor-bearing nude mice at 4 weeks p.i.**

|               | GLV-1h68           |                   |   |                   | GLV-1h107         |                   |                   |                   | GLV-1h108          |                   |                   |                   | GLV-1h109         |                   |                   |                   |
|---------------|--------------------|-------------------|---|-------------------|-------------------|-------------------|-------------------|-------------------|--------------------|-------------------|-------------------|-------------------|-------------------|-------------------|-------------------|-------------------|
| Animal no.    | 1                  | 2                 | 3 | 4                 | 5                 | 6                 | 7                 | 8                 | 9                  | 10                | 11                | 12                | 13                | 14                | 15                | 16                |
| Bladder       | 0                  | 0                 | 0 | 0                 | 45.5              | 1,180             | 0                 | 0                 | 0                  | 0                 | 0                 | 0                 | 0                 | 0                 | 0                 | 0                 |
| Testes        | 0                  | 0                 | 0 | 0                 | 0                 | 0                 | 0                 | 0                 | 0                  | 0                 | 0                 | 0                 | 0                 | 0                 | 0                 | 0                 |
| Spleen        | 0                  | 0                 | 0 | 0                 | 37.3              | 0                 | 0                 | 0                 | 0                  | 0                 | 0                 | 0                 | 0                 | 0                 | 0                 | 0                 |
| Kidneys       | 0                  | 0                 | 0 | 0                 | 0                 | 0                 | 0                 | 0                 | 0                  | 0                 | 0                 | 0                 | 0                 | 0                 | 0                 | 0                 |
| Liver         | 0                  | 0                 | 0 | 0                 | 0                 | 0                 | 0                 | 0                 | 0                  | 0                 | 0                 | 0                 | 0                 | 0                 | 0                 | 0                 |
| Lungs         | 0                  | 0                 | 0 | 0                 | 0                 | 0                 | 0                 | 0                 | 0                  | 0                 | 0                 | 0                 | 0                 | 0                 | 0                 | 0                 |
| Heart         | 0                  | 0                 | 0 | 0                 | 0                 | 0                 | 0                 | 0                 | 0                  | 0                 | 0                 | 0                 | 0                 | 0                 | 0                 | 0                 |
| Brain         | 0                  | 0                 | 0 | 0                 | 0                 | 0                 | 0                 | 0                 | 0                  | 0                 | 0                 | 0                 | 0                 | 0                 | 0                 | 0                 |
| Tumor         | 0                  | $2.4 \times 10^7$ | 0 | $2.5 \times 10^7$ | 0                 | $1.0 \times 10^7$ | $5.9 \times 10^6$ | $9.8 \times 10^6$ | $1.9 \times 10^7$  | $1.1 \times 10^7$ | $1.2 \times 10^7$ | $4.8 \times 10^6$ | $4.6 \times 10^6$ | $2.3 \times 10^6$ | $3.9 \times 10^6$ | $1.1 \times 10^6$ |
| Tumor, median | $2.45 \times 10^7$ |                   |   |                   | $9.8 \times 10^6$ |                   |                   |                   | $1.15 \times 10^7$ |                   |                   |                   | $3.1 \times 10^6$ |                   |                   |                   |

Table S1 (continued). Biodistribution of GLV-1h107, GLV-1h108, and GLV-1h109 VACV in A549 tumor-bearing nude mice at 6 weeks p.i.

|               | GLV-1h68           |                    |                    |                    | GLV-1h107          |                    |                    |                    | GLV-1h108          |                    |    | GLV-1h109          |                    |                    |                    |
|---------------|--------------------|--------------------|--------------------|--------------------|--------------------|--------------------|--------------------|--------------------|--------------------|--------------------|----|--------------------|--------------------|--------------------|--------------------|
| Animal no.    | 1                  | 2                  | 3                  | 4                  | 5                  | 6                  | 7                  | 8                  | 9                  | 10                 | 11 | 12                 | 13                 | 14                 | 15                 |
| Bladder       | 0                  | 0                  | 0                  | 0                  | 0                  | 0                  | 0                  | 0                  | 0                  | 0                  | 0  | 0                  | 0                  | 0                  | 0                  |
| Testes        | 0                  | 0                  | 0                  | 0                  | 0                  | 0                  | 0                  | 0                  | 0                  | 0                  | 0  | 0                  | 0                  | 0                  | 0                  |
| Spleen        | 0                  | 0                  | 0                  | 0                  | 0                  | 0                  | 0                  | 0                  | 0                  | 0                  | 0  | 0                  | 0                  | 0                  | 0                  |
| Kidneys       | 0                  | 0                  | 0                  | 0                  | 0                  | 0                  | 0                  | 0                  | 0                  | 0                  | 0  | 0                  | 0                  | 0                  | 0                  |
| Liver         | 0                  | 0                  | 0                  | 0                  | 0                  | 0                  | 0                  | 0                  | 0                  | 0                  | 0  | 0                  | 0                  | 0                  | 0                  |
| Lungs         | 0                  | 0                  | 0                  | 0                  | 0                  | 0                  | 59.5               | 732                | 0                  | 0                  | 0  | 0                  | 0                  | 0                  | 0                  |
| Heart         | 0                  | 0                  | 0                  | 0                  | 0                  | 0                  | 0                  | 0                  | 0                  | 0                  | 0  | 0                  | 0                  | 0                  | 0                  |
| Brain         | 0                  | 0                  | 0                  | 0                  | 0                  | 0                  | 0                  | +++                | 0                  | 0                  | 0  | 0                  | 0                  | 0                  | 0                  |
| Tumor         | $1.64 \times 10^6$ | $4.89 \times 10^6$ | $3.81 \times 10^6$ | $5.07 \times 10^6$ | $3.49 \times 10^6$ | $4.39 \times 10^6$ | $5.21 \times 10^6$ | $1.98 \times 10^7$ | $1.17 \times 10^6$ | $2.60 \times 10^6$ | 0  | $5.90 \times 10^5$ | $7.81 \times 10^6$ | $1.73 \times 10^6$ | $1.37 \times 10^6$ |
| Tumor, median | $4.35 \times 10^6$ |                    |                    |                    | $4.8 \times 10^6$  |                    |                    |                    | $8.8 \times 10^5$  |                    |    | $1.73 \times 10^6$ |                    |                    |                    |
